# Supplementary material for: The Post-Septic Peripheral Myeloid Compartment Reveals Unexpected Diversity in Myeloid-Derived Suppressor Cells
Source: medRxiv preprint, doi:10.1101/2024.01.05.24300902, version 1 (2024-01-07)
Supplement: Supplemental Figures [file 300902_file12.docx]

Supplementary Material

## Supplementary Figures


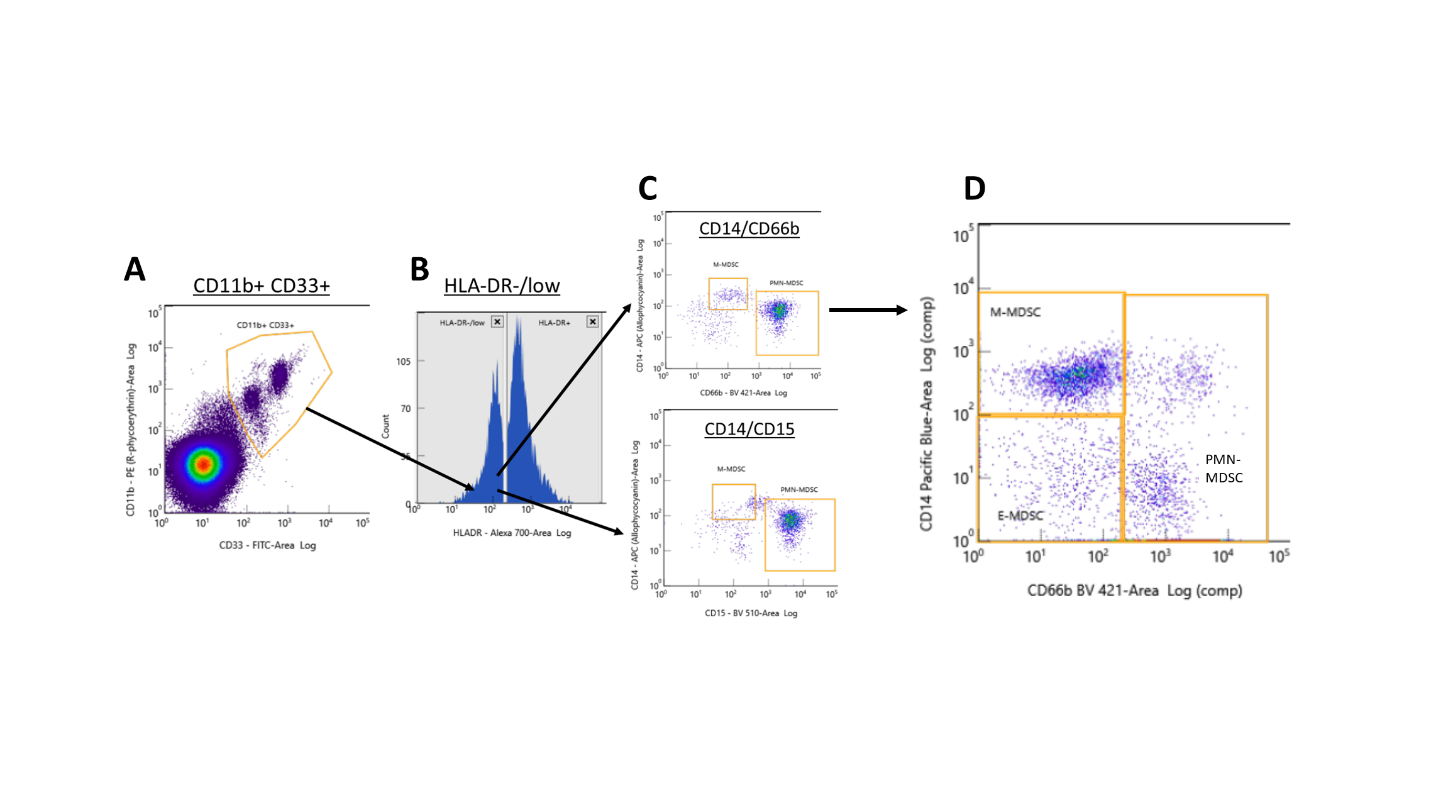


**Supplementary Figure 1. Identification of MDSC phenotypes via flow cytometry with the cell surface markers CD14, CD15, and CD66b.** **(A)** Cells were initially gated for doublet exclusion, then viable cells were determined using Sytox Live/Dead stain. Subsequently, the CD11b+ and CD33+ cells were gated. **(B)** HLA-DRlow cells were selected to capture the total MDSC population (CD11b+ CD33+ HLA-DRlow). **(C)** Initially, CD14 and CD15 were used to isolate MDSC subpopulations (bottom panel); however, it was found that CD66b selection provided better discrimination (top panel). **(D)** From the total MDSC population, the E-MDSC (CD14- CD15- CD66b-), M-MDSC (CD14+ CD66blow), and PMN-MDSC (CD15+ CD66bhigh) subpopulations are determined.


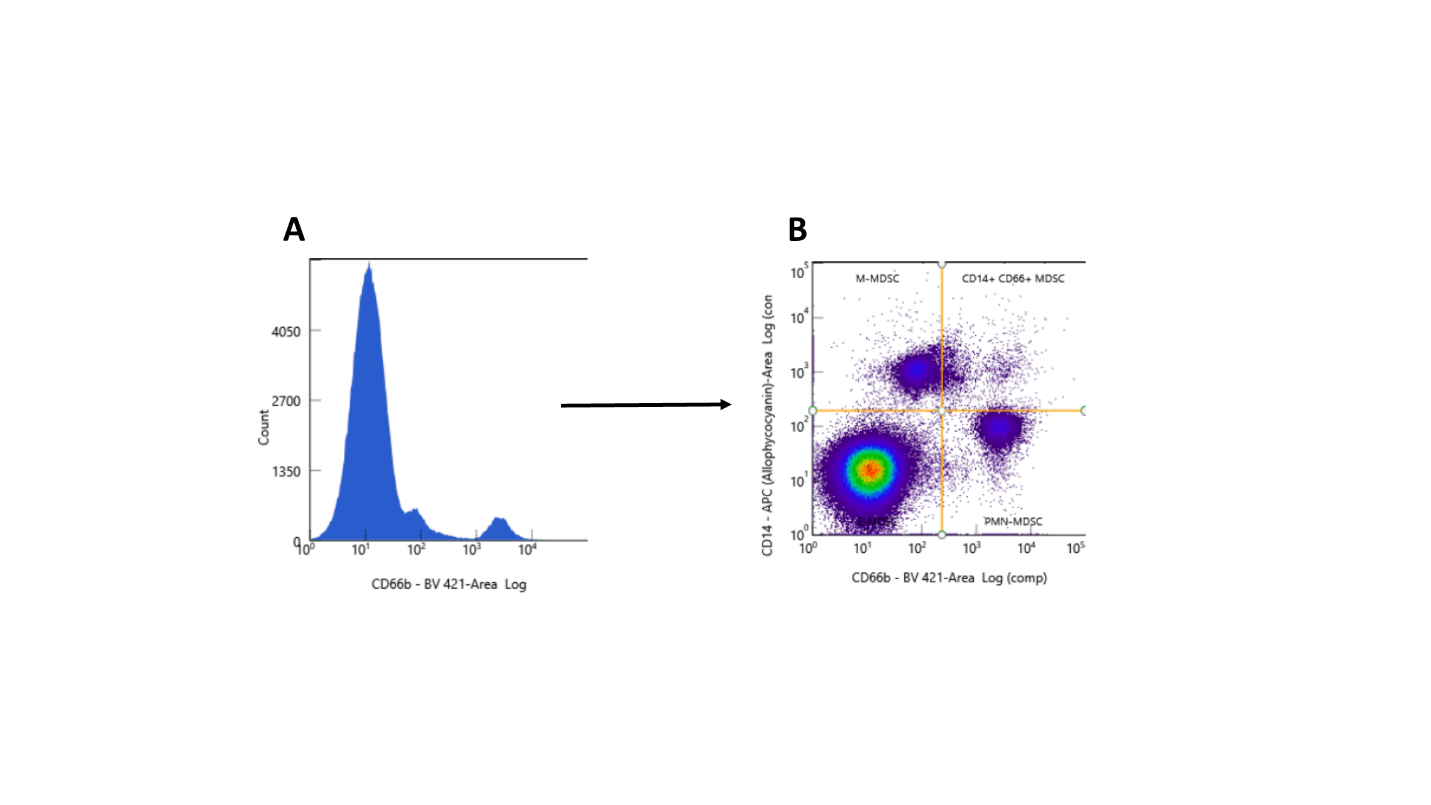


**Supplementary Figure 2. Isolation of CD66b+ cells from the PBMC layer in a septic patient. (A)** CD66b+ cells were isolated from the peripheral blood mononuclear cell (PBMC) layer via STEMCELL positive selection kit. Populations of CD66blow and CD66bhigh were visualized. **(B)** M-MDSCs are CD66blow and PMN-MDSCs are CD66bhigh. Both were present in the CD66b+ isolation, which should just be PMN-MDSCs (CD66bhigh).

**
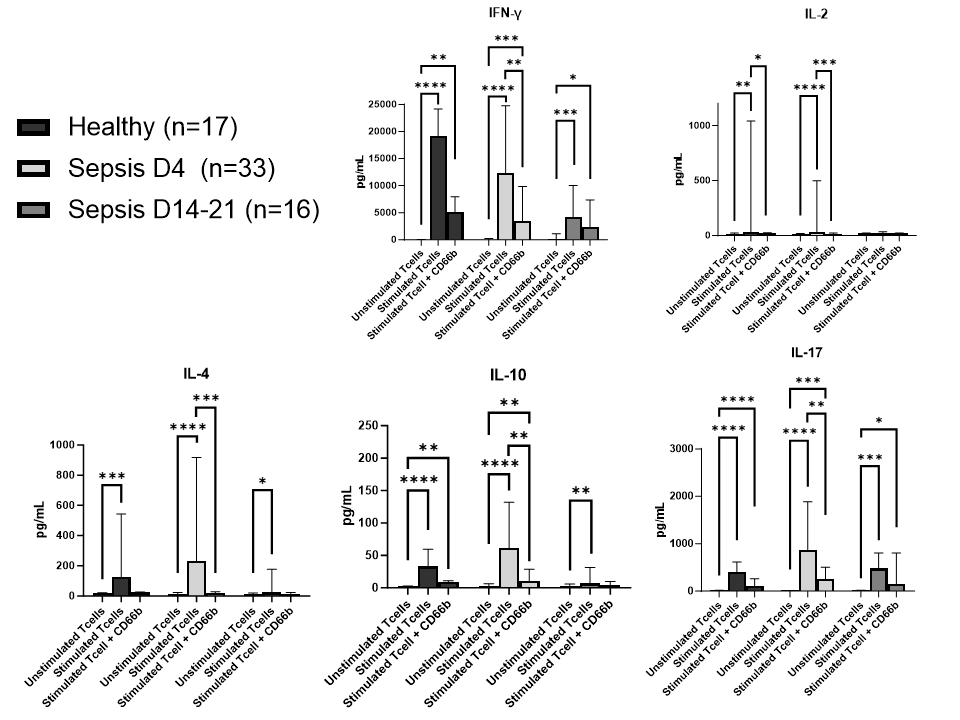
**

**Supplementary Figure 3.** **Proliferation index and cytokine production of CD4+ and CD8+ T cells in septic patients and healthy subjects.** Level of cytokine production by CD4+ and CD8+ lymphocytes in 10 healthy subjects (“Healthy”), 18 acutely septic patients (“Sepsis D4”), and 8 septic patients at day 14-21 (“Sepsis D14-21”). T lymphocytes plated and stimulated with soluble anti-CD3/CD28 antibodies or without (control). CD66b+ cells also isolated from the PBMC fraction via positive selection kit. Cells co-cultured with stimulated T cells in a 1:1 ratio. Supernatants after culture were obtained for cytokine analysis. The Kruskal-Wallis test was used for analysis of medians between groups. CD4: CD4+ lymphocytes, CD8: CD8+ lymphocytes. *: *p*<0.05, **: *p*<0.01, ***: *p*<0.001, ****: *p*<0.0001.

**
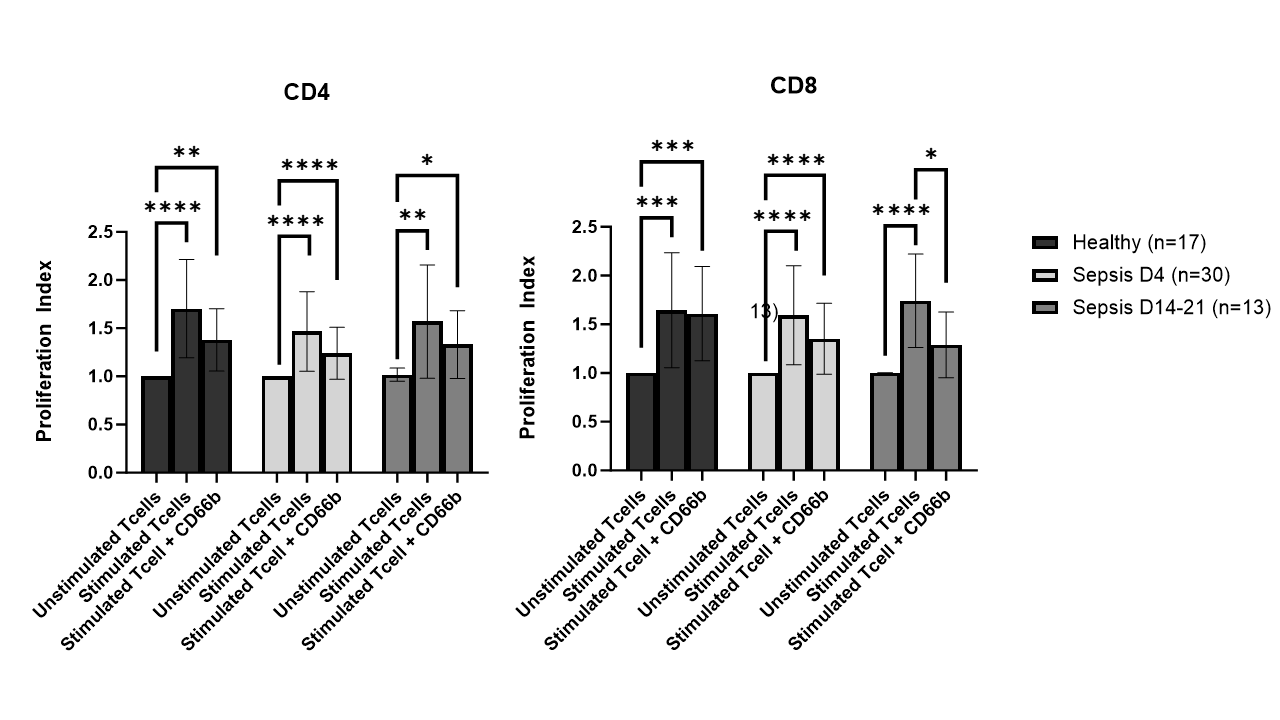
**

**Supplementary Figure 4.** **Proliferation index of CD4+ and CD8+ T cells in septic patients and healthy subjects.** T cells isolated from peripheral blood mononuclear cell (PBMC) suspension from 10 healthy subjects (“Healthy”), 18 septic patients at day 4 (“Sepsis D4”), and 7 septic patients at day 14-21 (“Sepsis D14-21”) using the same techniques as patients whose samples underwent processing and scRNA-seq. T lymphocytes plated and stimulated with soluble anti-CD3/CD28 antibodies or without (control). CD66b+ cells also isolated from the PBMC fraction via positive selection kit. Cells co-cultured with stimulated T cells in a 1:1 ratio. Proliferation indices calculated as the total number of cell divisions divided by the number of cells that went into division. The Kruskal-Wallis test was used for analysis of medians between groups. CD4: CD4+ lymphocytes, CD8: CD8+ lymphocytes. *: *p*<0.05, **: *p*<0.01, ***: *p*<0.001, ****: *p*<0.0001.


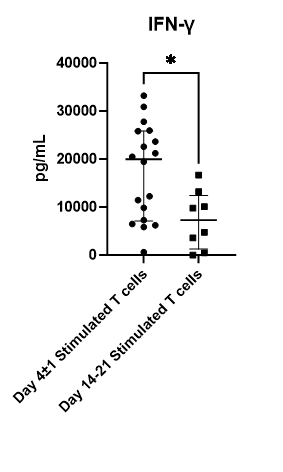


**Supplementary Figure 5.** **IFN-γ expression in stimulated T cells between acute and sub-acute sepsis patients.** CD4+ and CD8+ T cells were isolated from PBMC suspension. They were stimulated with soluble anti-CD3/CD28 antibodies and cultured. After 4 days, cells were harvested and supernatants analyzed for expression of IFN-γ. Groups were stimulated T cells from patients with acute sepsis at day 4 (n=18) and stimulated T cells from patient samples 14-21 days after sepsis onset (n=8). Difference assessed via unpaired non-parametric Mann-Whitney test. *: *p*<0.05.
